# Supplementary material for: Effect of B-site complex substitutions on orthorhombic distortion and microwave dielectric properties of Ca(Zr0.95Ti0.05)O3 perovskites
Source: Royal Society of Chemistry journal article supplement (doi:10.1039/d4tc00062e), 2024-01-01
Supplement: d4tc00062e1.pdf [file d4tc00062e1.pdf]

## Supporting Information

### **Effect of B-site complex substitutions on orthorhombic distortion and microwave dielectric properties of $\text{Ca}(\text{Zr}_{0.95}\text{Ti}_{0.05})\text{O}_3$ perovskites**

Xin Wang,<sup>a</sup> Tao Zhou,<sup>\*b</sup> Wei Wang,<sup>a</sup> Zhaochen Xi,<sup>a</sup> Diming Xu,<sup>a</sup> Chao Du,<sup>a</sup> Xiao-Gang Yao,<sup>c</sup> Hui-Xing Lin,<sup>c</sup> Huiqi Xia,<sup>d</sup> Biaobing Jin,<sup>e</sup> Yongqiang Pang,<sup>a</sup> Haijie Zhang,<sup>f</sup> Chao Liang,<sup>f</sup> and Di Zhou<sup>\*a</sup>

<sup>a</sup>Key Laboratory of Multifunctional Materials and Structures, Ministry of Education, School of Electronic Science and Engineering, Xi'an Jiaotong University, Xi'an 710049, Shaanxi, China.

<sup>b</sup>School of Information Engineering, Xinjiang Institute of Technology.

<sup>c</sup>Key Laboratory of Inorganic Functional Material and Device, Shanghai Institute of Ceramics Chinese Academy of Sciences, Shanghai 200050, China.

<sup>d</sup>Key Laboratory of LCR Materials and Devices of Yunnan Province, National Center for International Research on Photoelectric and Energy Materials, School of Materials and Energy, Yunnan University, Kunming 650091, P. R. China.

<sup>e</sup>Research Institute of Superconductor Electronics (RISE), School of Electronic Science and Engineering, Nanjing University, Nanjing 210093, Jiangsu China.

<sup>f</sup>Chengdu 899 Technology Co., Ltd.

Corresponding authors: Tao Zhou (antema@126.com), Di Zhou (zhoudi1220@gmail.com)

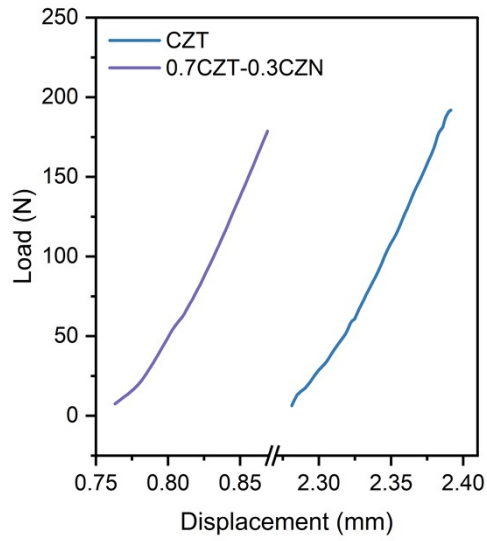

Figure SI 1. Flexural load-displacement curves of CZT (blue line) and 0.7CZT-0.3CZN (purple line) were shown.

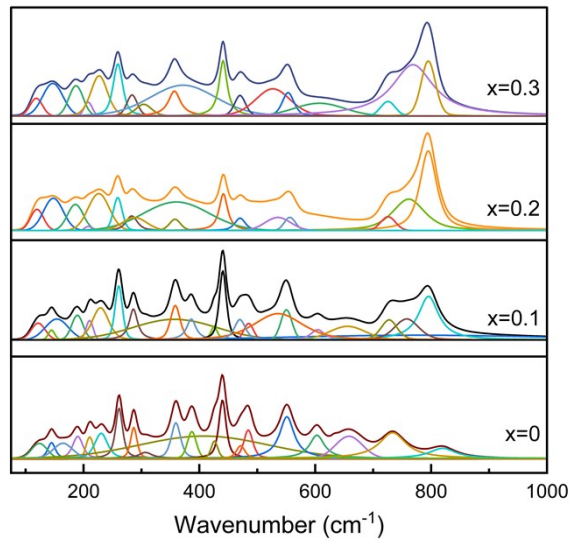

Figure SI 2. Raman fitted data for individual sample (1-x)CZT-xCZN were shown.
